# INFOGRAPHICS IN ANESTHESIOLOGY

Complex Information for Anesthesiologists Presented Quickly and Clearly

## Twitch Monitor to Choose? Quantitative Intraoperative Neuromuscular Monitoring

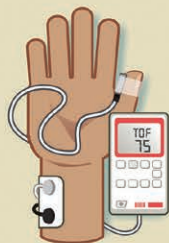

Quantitative train-of-four (TOF) monitoring is recommended after neuromuscular blocking drug (NMB) administration.<sup>1</sup> In this issue of ANESTHESIOLOGY, Weigel

*et al.* describe a quality improvement project aimed at attaining documented quantitative TOF ratios  $\geq 0.90$  in all patients receiving NMB.<sup>2</sup>

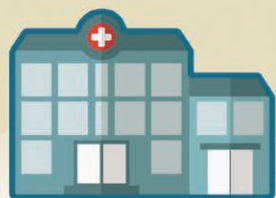

300-bed urban teaching hospital with 28 anesthetizing locations

By combining principles of quality improvement and implementation science, evidence-based practices can be implemented in routine clinical care. Weigel *et al.* demonstrated  $>90\%$  compliance with documented TOF  $\geq 0.90$ , which persisted after project completion.

TOF  $\geq 0.9^*$

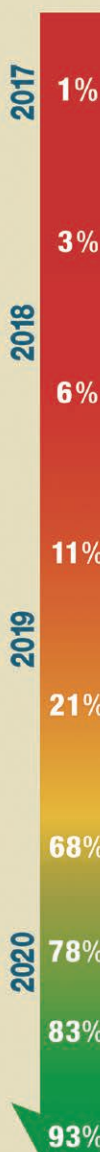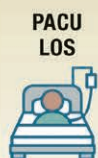

73 m  
[55,102]

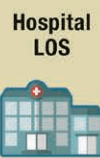

3 days  
[2,5]

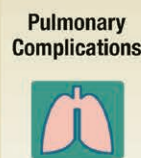

94 of 4,138  
(2.3%)

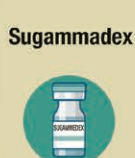

1,377 of 9,034  
(15%)

### Department Professional Practice Initiative

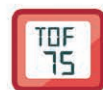

#### Monitors

Selection based on:

- Clinician feedback
- Projected costs in all anesthetizing locations

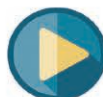

#### Instructional videos

- How to place electrodes
- Underlying technology
- Device menus

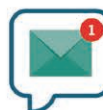

#### Reminders

- Automated charting reminders
- Department & individual emails

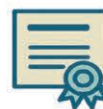

#### Performance

- Ongoing Professional Practice Performance metric
- Tied to credentialing

68 m  
[49,95]

$P < 0.001$

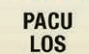

2 days  
[1,4]

$P < 0.001$

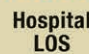

23 of 1,817  
(1.3%)

$P < 0.010$

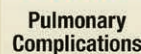

2,879 of 4,157  
(69%)

$P < 0.001$

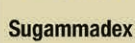

LOS, length of stay; PACU, postanesthesia care unit.

\*Percentage of cases with documentation of quantitative train-of-four  $\geq 0.90$ .

Infographic created by Holly B. Ende, Vanderbilt University Medical Center; James P. Rathmell, Brigham and Women's Health Care/Harvard Medical School; and Jonathan P. Wanderer, Vanderbilt University Medical Center. Illustration by Annemarie Johnson, Vivo Visuals Studio. Address correspondence to Dr. Ende: holly.ende@vumc.org.

1. Naguib M, Brull SJ, Kopman AF, Hunter JM, Fülesdi B, Arkes HR, Elstein A, Todd MM, Johnson KB: Consensus statement on perioperative use of neuromuscular monitoring. *Anesth Analg* 2018; 127:71–80
2. Weigel WA, Williams BL, Hanson NA, Blackmore CC, Johnson RL, Nissen GM, James AB, Strodbeck WM: Quantitative neuromuscular monitoring in clinical practice: A professional practice change initiative. *ANESTHESIOLOGY* 2022; 136:901–15
